# Supplementary material for: Withaferin A alleviates fulminant hepatitis by targeting macrophage and NLRP3
Source: PubMed Central journal article supplement (PMC7878893; doi:10.1038/s41419-020-03243-w), 2021-02-11
Supplement: 41419_2020_3243_MOESM8_ESM.pdf [file 41419_2020_3243_MOESM8_ESM.pdf]

### Supplementary Table 1. Antibody Information List

| <b>Protein name/Antigen</b> | <b>Company</b> | <b>Catalog #</b> | <b>RRID</b> |
|-----------------------------|----------------|------------------|-------------|
| Cleaved PARP-1              | cell signaling | 9548S            | AB_2160592  |
| CASP3                       | cell signaling | 9664S            | AB_2070042  |
| ATG3                        | cell signaling | 3415S            | AB_2059244  |
| LC3I/II                     | cell signaling | 12741S           | AB_2617131  |
| AMPK $\alpha$               | cell signaling | 5831T            | AB_10622186 |
| p-AMPK $\alpha$             | cell signaling | 2535T            | AB_331250   |
| ASC                         | cell signaling | 67824S           | AB_2799736  |
| pro-IL-1 $\beta$            | cell signaling | 12507S           | AB_2721117  |
| CASP1                       | Santa Cruz     | SC56036          | AB_781816   |
| NRF2                        | cell signaling | 12721T           | AB_2715528  |
