# Supplementary material for: Withaferin A alleviates fulminant hepatitis by targeting macrophage and NLRP3
Source: PubMed Central journal article supplement (PMC7878893; doi:10.1038/s41419-020-03243-w), 2021-02-11
Supplement: 41419_2020_3243_MOESM9_ESM.pdf [file 41419_2020_3243_MOESM9_ESM.pdf]

**Supplementary Table 2. List of mouse qPCR mRNA primers**

| Gene         | Forward primer sequence (5'~3') | Reverse primer sequence (5'~3') |
|--------------|---------------------------------|---------------------------------|
| <i>Actb</i>  | AAGTGCTTCTAGGCGGACTGTT          | TTTTCTGCGCAAGTTAGGTTTTG         |
| <i>Il6</i>   | ACCAGAGGAAATTTTCAATAGGC         | TGATGCACTTGCAGAAAACA            |
| <i>Il1b</i>  | GGTCAAAGGTTTGGAAAGCAG           | TGTGAAATGCCACCTTTTGA            |
| <i>Tnfa</i>  | AGGGTCTGGGCCATAGAACT            | CCACCACGCTCTTCTGTCTAC           |
| <i>Ccl2</i>  | TTAAAAACCTGGATCGGAACCAA         | GCATTAGCTTCAGATTTACGGGT         |
| <i>Nlrp3</i> | TCAGATTGCTGTGTGTGGGACTGA        | AGCTCAGAACCAATGCGAGATCCT        |
| <i>Asc</i>   | GCTGGTCCACAAAGTGCCT             | GAGCAGCTGCAAACGACTAA            |
| <i>Casp1</i> | TCAGCTCCATCAGCTGAAAC            | TGGAAATGTGCCATCTTCTTT           |
| <i>Hmox1</i> | AAGCCGAGAATGCTGAGTTCA           | GCCGTGTAGATATGGTACAAGGA         |
| <i>Gclc</i>  | TCAAGTGGGGTGACGAGGTG            | GGTCGGATGGTTGGGGTTTG            |
| <i>Cat</i>   | TCCGCTCTCTGTCAAAGTGTG           | AGCGACCAGATGAAGCAGTG            |
| <i>Gsta1</i> | CCCCTTTCCCTCTGCTGAAG            | TGCAGCTTCACTGAATCTTGAAAG        |
| <i>Nqo1</i>  | CATCACAGGTGAGCTGAAGGA           | ACAATATCTGGGCTCAGGCG            |
| <i>Keap1</i> | GCGTGGAGAGATATGAGCCA            | CATACAGCAAGCGGTTGAGC            |
| <i>Nrf2</i>  | GGTTGCCACATTCCCAAAC             | GCAAGCGACTCATGGTCATC            |
| <i>F4/80</i> | TGA CTC ACC TTG TGG TCC TAA     | CTT CCC AGA ATC CAG TCT TTC C   |
