# Supplementary material for: Withaferin A alleviates fulminant hepatitis by targeting macrophage and NLRP3
Source: Cell Death Dis. 2021 Feb 11;12(2):174. doi: 10.1038/s41419-020-03243-w (PMC7878893; doi:10.1038/s41419-020-03243-w)
Supplement: Supplementary file 2 — Legends to Supplementary Figures [file 41419_2020_3243_MOESM2_ESM.pdf]

## Legends to supplementary figures

**Supplementary Fig. S1. Effect of WA in the cell viability of ATCD/TNF- $\alpha$  or GalN/TNF- $\alpha$ -treated primary hepatocyte *in vitro*.** a, cell viability of hepatocytes treated with WA alone at the doses of 0-0.5  $\mu$ M (n=5). b and c, cell viability of ACTD/TNF $\alpha$ - (b) or GalN/TNF- $\alpha$  (c)-treated hepatocytes treated with WA at the doses of 0, 0.01, 0.1, 0.5  $\mu$ M or ZVAD at 10  $\mu$ M as a positive control, n=6. Data are presented as means  $\pm$  SD. One-way ANOVA was used for statistical analyses. ####p < 0.005; \*\*\*p < 0.05, \*\*p < 0.005. DMSO, dimethyl sulfoxide.

**Supplementary Fig. S2. WA induced hepatic NRF2 signaling, while the hepatoprotective effect of WA was independent of NRF2.** a, NRF2 protein levels in mouse livers. b, mRNA levels of *Nrf2* and its target genes in mouse livers. c and d, serum ALT levels and liver H&E staining in GalN/LPS-treated *Nrf2*<sup>-/-</sup> mice (n=7). Data are presented as means  $\pm$  SD (n=5 unless otherwise indicated). Groups were same as described in Figure 1 legend. One-way ANOVA or unpaired two-tailed t test was used for statistical analyses. #p < 0.05, ##p < 0.01, ###p < 0.005 versus Control group; \*p < 0.05, \*\*p < 0.01, \*\*\*p < 0.005 versus V + GalN/LPS group.

**Supplementary Fig. S3: Effects of WA on NRF2 target genes in non-treated WT and *Nrf2*<sup>-/-</sup> mice, or in GalN/LPS-treated *Nrf2*<sup>-/-</sup> mice.** a, hepatic mRNA levels of *Nrf2* and its target genes in normal non-challenged mice treated with control vehicle (Control) or WA at doses of 10 mg/kg, n=5. b, hepatic *Nrf2* mRNA levels and NRF2 target genes in GalN/LPS-challenged *Nrf2*-null mice treated with control vehicle (V + GalN/LPS) or 10 mg/kg of WA (WA + GalN/LPS), n=8. Data are presented as means  $\pm$  SD. Two-tailed t test was used for statistical analyses. \*p < 0.05 and \*\*\*p < 0.005 versus WT: Control group for Fig. S3a; and \*\*\*p < 0.005 versus V + GalN/LPS group for Fig.S3b.

**Supplementary Fig. S4: The hepatoprotective effect of WA was independent of hepatic AMPK $\alpha$  and I $\kappa$ B.** a, western blot analysis for AMPK $\alpha$ , and p-AMPK $\alpha$  (n=3). b, quantitation analysis for relative protein levels (n=3). c, serum ALT levels for GalN/LPS-treated *Ampka1* <sup>$\Delta$ Hep</sup> mice and its matched *Ampka1*<sup>fl/fl</sup> mice treated with or

without WA. d, hepatic protein levels of AMPK $\alpha$  in the livers of *Ampka1* <sup>$\Delta$ Hep</sup> and its matched *Ampka1*<sup>fl/fl</sup> mice (n=3). e, quantitation analysis for AMPK $\alpha$  levels (n=3). f, serum ALT levels for GalN/LPS-treated *Ikkb* <sup>$\Delta$ Hep</sup> mice and its matched *Ikkb*<sup>fl/fl</sup> mice treated with or without WA. g, liver H&E staining for the GalN/LPS-treated *Ikkb* <sup>$\Delta$ Hep</sup> mice or matched *Ikkb*<sup>fl/fl</sup> that were treated with or without WA. Data are presented as means  $\pm$  SD (n=5 unless otherwise indicated). One-way ANOVA or unpaired two-tailed t test was used for statistical analyses. ##p < 0.01, ###p < 0.005 versus Control; \*P<0.05, \*\*P<0.01 and \*\*\*p < 0.005 versus V + GalN/LPS.

**Supplementary Fig. S5: Analyses of primary macrophage.** a, western blot analysis for ASC, cleaved-CASP1 and IL-1 $\beta$  for GalN/LPS treated mice at 0 h, 1 h, 3 h and 6 h post LPS dosing. b, quantitation analysis for relative protein levels (n=4). c, mRNA levels of macrophage isolated from WT mice and *Nlrp3*<sup>-/-</sup> mice. d, effects of WA at doses of 0, 0.2, 0.5  $\mu$ M in LPS-induced upregulation of *Nlrp3* mRNA in primary peritoneal macrophage isolated from WT mice. e and f, the effect of testing reagents in the cell viability when used alone in WT macrophages (e) and *Nlrp3*<sup>-/-</sup> macrophages (f). Data are presented as means  $\pm$  SD (n=5). One-way ANOVA or two-tailed t test was used for statistical analyses. Groups was same as described in Fig.6. ###p < 0.005 versus Control group; \*\*p < 0.01.
